# Supplementary material for: Stunting, age at school entry and academic performance in developing countries: A systematic review and meta-analysis
Source: Research Square preprint supplement (doi:10.21203/rs.3.rs-606866/v1), 2021-06-16
Supplement: Supplementary file 1 [file 3c9565578062830a76c700b0.docx]

Table 5.1 : PubMed research strategy

| **Database** | **#** | **Concept** | **Search strategy** |
| --- | --- | --- | --- |
|
| PubMed  / 20210320 | #1 | Population= primary school age children | "Child*"[TIAB] OR preschooler*[tiab] OR "Child"[Mesh] OR "Child, Preschool"[Mesh] |
| #2 | Exposition = stunting | "Growth Disorder"[TIAB] OR "Growth Disorders"[TIAB] OR Stunt*[TIAB] OR nutrit*[TIAB] OR "Growth Failure"[TIAB] OR "height-for-age"[tiab] OR height[tiab] OR HAZ[tiab] OR "Growth Disorders"[Mesh] OR "Body Height"[Mesh] OR "Anthropometry"[Mesh] |
| #3 | Outcome = schooling trajectory | Enrollment*[TIAB] OR "age at school entry"[TIAB] OR "school start"[TIAB] OR 'school admission'[TIAB] OR "grade repetition" [TIAB] OR "school progression"[TIAB] OR repeat*[TIAB] OR "school dropout"[TIAB] OR "school dropouts"[TIAB] OR " school drop out"[TIAB] OR " school drop outs"[TIAB] OR "leave school"[TIAB] OR "academic achievement"[TIAB] OR "School performance"[TIAB] OR "School performances"[TIAB] OR "Student Dropouts"[Mesh] OR "Academic Failure"[Mesh] OR "Educational Status"[Mesh] OR "Academic Performance"[Mesh] |
| #4 | Geographic area = developing countries[1] | "Developing Countries"[Mesh] OR "Africa, Northern"[Mesh] or algeria[Mesh] OR egypt[Mesh] OR libya[Mesh] OR morocco[Mesh] OR tunisia[Mesh] OR "Africa, Central"[Mesh] OR cameroon[Mesh] OR "central african republic"[Mesh] OR chad[Mesh] OR congo[Mesh] OR "democratic republic of the congo"[Mesh] OR "Equatorial Guinea"[Mesh] OR gabon[Mesh] OR "Sao Tome and Principe"[Mesh] OR burundi[Mesh] OR djibouti[Mesh] OR eritrea[Mesh] OR ethiopia[Mesh] OR kenya[Mesh] OR rwanda[Mesh] OR somalia[Mesh] OR "south sudan"[Mesh] OR sudan[Mesh] OR tanzania[Mesh] OR uganda[Mesh] OR "Africa, Southern"[Mesh] OR angola[Mesh] OR botswana[Mesh] OR lesotho[Mesh] OR malawi[Mesh] OR mozambique[Mesh] OR namibia[Mesh] OR "South Africa"[Mesh] OR swaziland[Mesh] OR zambia[Mesh] OR zimbabwe[Mesh] OR "Africa, Western"[Mesh] OR benin[Mesh] OR "Burkina Faso"[Mesh] OR "Cabo Verde"[Mesh] OR "Cote d'Ivoire"[Mesh]OR gambia[Mesh] OR ghana[Mesh] OR guinea[Mesh] OR "Guinea-Bissau"[Mesh] OR liberia[Mesh] OR mali[Mesh] OR mauritania[Mesh] OR niger[Mesh] OR nigeria[Mesh] OR senegal[Mesh] OR sierra leone[Mesh] OR togo[Mesh] OR "Caribbean Region"[Mesh] OR aruba[Mesh] OR "Caribbean Netherlands"[Mesh] OR curacao[Mesh] OR "Sint Maarten"[Mesh] OR "antigua and barbuda"[Mesh] OR bahamas[Mesh] OR barbados[Mesh] OR "British Virgin Islands"[Mesh] OR cuba[Mesh] OR dominica[Mesh] OR "Dominican Republic"[Mesh] OR grenada[Mesh] OR guadeloupe[Mesh] OR haiti[Mesh] OR jamaica[Mesh] OR martinique[Mesh] OR "Puerto Rico"[Mesh] OR "saint kitts and nevis"[Mesh] OR "Saint Lucia"[Mesh] OR "Saint Vincent and the Grenadines"[Mesh] OR "Trinidad and Tobago"[Mesh] OR "United States Virgin Islands"[Mesh] OR belize[Mesh] OR "Costa Rica"[Mesh] OR "El SalvadOR"[Mesh] OR guatemala[Mesh] OR honduras[Mesh] OR nicaragua[Mesh] OR panama[Mesh] OR mexico[Mesh] OR argentina[Mesh] OR bolivia[Mesh] OR brazil[Mesh] OR chile[Mesh] OR colombia[Mesh] OR ecuador[Mesh] OR "French Guiana"[Mesh] OR guyana[Mesh] OR paraguay[Mesh] OR peru[Mesh] OR suriname[Mesh] OR uruguay[Mesh] OR venezuela[Mesh] OR asia[Mesh] OR "Asia, Central"[Mesh] OR kazakhstan[Mesh] OR kyrgyzstan[Mesh] OR tajikistan[Mesh] OR turkmenistan[Mesh] OR uzbekistan[Mesh] OR "asia, northern"[Mesh] OR russia[Mesh] OR siberia[Mesh] OR "Asia, Southeastern"[Mesh] OR borneo[Mesh] OR brunei[Mesh] OR cambodia[Mesh] OR indochina[Mesh] OR "timor-leste"[Mesh] OR indonesia[Mesh] OR laos[Mesh] OR malaysia[Mesh] OR "Mekong Valley"[Mesh] OR myanmar[Mesh] OR philippines[Mesh] OR singapore[Mesh] OR thailand[Mesh] OR vietnam[Mesh] OR bangladesh[Mesh] OR bhutan[Mesh] OR india[Mesh] OR sikkim[Mesh] OR "Middle East"[Mesh] OR nepal[Mesh] OR pakistan[Mesh] OR "Sri Lanka"[Mesh] OR "Far East"[Mesh] OR china[Mesh] OR beijing[Mesh] OR macau[Mesh] OR tibet[Mesh] OR korea[Mesh] OR "Democratic People's Republic of Korea"[Mesh] OR "Republic of Korea"[Mesh] OR mongolia[Mesh] OR taiwan[Mesh] OR "United Arab Emirates"[Mesh] OR "Georgia (Republic)"[Mesh] OR "developing country"[tiab] OR "developing countries"[tiab] OR "developing nation"[tiab] OR "developing nations"[tiab] OR Afghanistan[tiab] OR Albania[tiab] OR Algeria[tiab] OR Angola[tiab] OR Antigua[tiab] OR Barbuda[tiab] OR Argentina[tiab] OR Armenia[tiab] OR Aruba[tiab] OR Azerbaijan[tiab] OR Bahamas[tiab] OR Bahrain[tiab] OR Bangladesh[tiab] OR Barbados[tiab] OR Belarus[tiab] OR Belize[tiab] OR Benin[tiab] OR Bhutan[tiab] OR Bolivia[tiab] OR Bosnia[tiab] OR Herzegovina[tiab] OR Botswana[tiab] OR Brazil[tiab] OR Brunei[tiab] OR Bulgaria[tiab] OR "Burkina Faso"[tiab] OR Burundi[tiab] OR Cambodia[tiab] OR Cameroon[tiab] OR "Cape Verde"[tiab] OR "Central African Republic" [tiab] OR Chad[tiab] OR Chile[tiab] OR China[tiab] OR Colombia[tiab] OR Comoros[tiab] OR Democratic[tiab] OR Congo[tiab] OR "Costa Rica"[tiab] OR "Cote d'Ivoire"[tiab] OR Djibouti[tiab] OR Dominica[tiab] OR "Dominican Republic"[tiab] OR Ecuador[tiab] OR Egypt[tiab] OR "El Salvador"[tiab] OR "Equatorial Guinea"[tiab] OR Eritrea[tiab] OR Eswatini[tiab] OR Ethiopia[tiab] OR Fiji[tiab] OR Gabon[tiab] OR Gambia[tiab] OR Ghana[tiab] OR Grenada[tiab] OR Guatemala[tiab] OR Guinea[tiab] OR "Guinea-Bissau"[tiab] OR Guyana[tiab] OR Haiti[tiab] OR Honduras[tiab] OR Hungary[tiab] OR India[tiab] OR Indonesia[tiab] OR Iran[tiab] OR Iraq[tiab] OR Jamaica[tiab] OR Jordan[tiab] OR Kazakhstan[tiab] OR Kenya[tiab] OR Kiribati[tiab] OR Kosovo[tiab] OR Kuwait[tiab] OR Kyrgyzstan[tiab] OR Laos[tiab] OR Lebanon[tiab] OR Lesotho[tiab] OR Liberia[tiab] OR Libya[tiab] OR Macedonia[tiab] OR Madagascar[tiab] OR Malawi[tiab] OR Malaysia[tiab] OR Maldives[tiab] OR Mali[tiab] OR "Marshall Islands"[tiab] OR Mauritania[tiab] OR Mauritius[tiab] OR Mexico[tiab] OR Micronesia[tiab] OR Moldova[tiab] OR Mongolia[tiab] OR Montenegro[tiab] OR Morocco[tiab] OR Mozambique[tiab] OR Myanmar[tiab] OR Namibia[tiab] OR Nauru[tiab] OR Nepal[tiab] OR Nicaragua[tiab] OR Niger[tiab] OR Nigeria[tiab] OR Oman[tiab] OR Pakistan[tiab] OR Palau[tiab] OR Panama[tiab] OR Papua[tiab] OR "New Guinea"[tiab] OR Paraguay[tiab] OR Peru[tiab] OR Philippines[tiab] OR Poland[tiab] OR Qatar[tiab] OR Romania[tiab] OR Russia[tiab] OR Rwanda[tiab] OR "Saint Kitts"[tiab] OR Nevis[tiab] OR "Saint Lucia"[tiab] OR "Saint Vincent"[tiab] OR Grenadines[tiab] OR Samoa[tiab] OR "Sao Tome"[tiab] OR "Saudi Arabia"[tiab] OR Senegal[tiab] OR Serbia[tiab] OR Seychelles[tiab] OR Sierra[tiab] OR Leone[tiab] OR "Solomon Islands"[tiab] OR Somalia[tiab] OR "South Africa"[tiab] OR "South Sudan"[tiab] OR "Sri Lanka"[tiab] OR Sudan[tiab] OR Suriname[tiab] OR Swaziland[tiab] OR Syria[tiab] OR Tajikistan[tiab] OR Tanzania[tiab] OR Thailand[tiab] OR "Timor-Leste"[tiab] OR Togo[tiab] OR Tonga[tiab] OR Trinidad[tiab] OR Tobago[tiab] OR Tunisia[tiab] OR Turkey[tiab] OR Turkmenistan[tiab] OR Tuvalu[tiab] OR Uganda[tiab] OR Ukraine[tiab] OR "United Arab Emirates"[tiab] OR Uruguay[tiab] OR Uzbekistan[tiab] OR Vanuatu[tiab] OR Venezuela[tiab] OR Vietnam[tiab] OR Yemen[tiab] OR Zambia[tiab] OR Zimbabwe[tiab] |

Table 5.2 : Embase research strategy

| **Database** | **#** | **Concept** | **Search strategy** |
| --- | --- | --- | --- |
|
| Embase  / 20210320 | #1 | Population= primary school age children | Child*:ti,ab,kw OR preschooler*:ti,ab,kw OR 'child'/exp OR 'preschool child'/exp |
| #2 | Exposition = stunting | 'Growth Disorder':ti,ab,kw OR 'Growth Disorders':ti,ab,kw OR Stunt*:ti,ab,kw OR nutrit*:ti,ab,kw OR 'Growth Failure':ti,ab,kw OR 'Growth Failures':ti,ab,kw OR 'height for age':ti,ab,kw OR Height:ti,ab,kw OR HAZ:ti,ab,kw OR 'short stature'/exp OR 'growth disorder'/exp OR 'body height'/exp OR 'anthropometry'/exp |
| #3 | Outcome = schooling trajectory | 'Enrollment*':ti,ab,kw OR 'age at school entry':ti,ab,kw OR 'school start':ti,ab,kw OR 'school admission':ti,ab,kw OR 'school performance':ti,ab,kw OR 'academic performances':ti,ab,kw OR 'school dropout':ti,ab,kw OR 'school dropouts':ti,ab,kw OR 'school drop out':ti,ab,kw OR 'school drop outs':ti,ab,kw OR 'grade repetition':ti,ab,kw OR 'grade repeat*':ti,ab,kw OR 'school progression':ti,ab,kw OR 'leave school':ti,ab,kw OR 'school dropout'/exp OR 'academic achievement'/exp OR 'educational status'/exp |
| #4 | Geographic area = developing countries[1] | 'developing country'/exp OR 'North Africa'/exp OR algeria/exp OR egypt/exp OR libya/exp OR morocco/exp OR tunisia/exp OR 'Africa south of the Sahara'/exp OR 'Central Africa'/exp OR cameroon/exp OR 'Central African Republixc'/exp OR chad/exp OR congo/exp OR 'democratic republic of the congo'/exp OR 'Equatorial Guinea'/exp OR gabon/exp OR 'Sao Tome and Principe'/exp OR burundi/exp OR djibouti/exp OR eritrea/exp OR ethiopia/exp OR kenya/exp OR rwanda/exp OR somalia/exp OR 'south sudan'/exp OR sudan/exp OR tanzania/exp OR uganda/exp OR angola/exp OR botswana/exp OR lesotho/exp OR malawi/exp OR mozambique/exp OR namibia/exp OR 'South Africa'/exp OR swaziland/exp OR zambia/exp OR zimbabwe/exp OR benin/exp OR 'Burkina Faso'/exp OR 'Cabo Verde'/exp OR 'Cote d`Ivoire'/exp OR gambia/exp OR ghana/exp OR guinea/exp OR 'Guinea-Bissau'/exp OR liberia/exp OR mali/exp OR mauritania/exp OR niger/exp OR nigeria/exp OR senegal/exp OR sierra leone/exp OR togo/exp OR 'Caribbean Region'/exp OR aruba/exp OR 'Caribbean Netherlands'/exp OR curacao/exp OR 'Sint Maarten'/exp OR 'antigua and barbuda'/exp OR bahamas/exp OR barbados/exp OR 'British Virgin Islands'/exp OR cuba/exp OR dominica/exp OR 'Dominican Republic'/exp OR grenada/exp OR guadeloupe/exp OR haiti/exp OR jamaica/exp OR martinique/exp OR 'Puerto Rico'/exp OR 'saint kitts and nevis'/exp OR 'Saint Lucia'/exp OR 'Saint Vincent and the Grenadines'/exp OR 'Trinidad and Tobago'/exp OR 'United States Virgin Islands'/exp OR belize/exp OR 'Costa Rica'/exp OR 'El Salvador'/exp OR guatemala/exp OR honduras/exp OR nicaragua/exp OR panama/exp OR mexico/exp OR argentina/exp OR bolivia/exp OR brazil/exp OR chile/exp OR colombia/exp OR ecuador/exp OR 'French Guiana'/exp OR guyana/exp OR paraguay/exp OR peru/exp OR suriname/exp OR uruguay/exp OR venezuela/exp OR asia/exp OR kazakhstan/exp OR kyrgyzstan/exp OR tajikistan/exp OR turkmenistan/exp OR uzbekistan/exp OR russia/exp OR siberia/exp OR 'Southeast Asia'/exp OR borneo/exp OR brunei/exp OR cambodia/exp OR indochina/exp OR 'timor-leste'/exp OR indonesia/exp OR laos/exp OR malaysia/exp OR 'Mekong Valley'/exp OR myanmar/exp OR philippines/exp OR singapore/exp OR thailand/exp OR vietnam/exp OR bangladesh/exp OR bhutan/exp OR india/exp OR sikkim/exp OR 'Middle East'/exp OR nepal/exp OR pakistan/exp OR 'Sri Lanka'/exp OR 'Far East'/exp OR china/exp OR beijing/exp OR macau/exp OR tibet/exp OR korea/exp OR 'North Korea'/exp OR 'South Korea'/exp OR mongolia/exp OR taiwan/exp OR 'United Arab Emirates'/exp OR 'georgia republic'/exp OR 'Papua New Guinea'/exp OR 'developing countr*':ti,ab,kw OR 'developing nation*':ti,ab,kw OR Afghanistan:ti,ab,kw OR Albania:ti,ab,kw OR Algeria:ti,ab,kw OR Angola:ti,ab,kw OR Antigua:ti,ab,kw OR arbuda:ti,ab,kw OR Argentina:ti,ab,kw OR Armenia:ti,ab,kw OR Aruba:ti,ab,kw OR Azerbaijan:ti,ab,kw OR Bahamas:ti,ab,kw OR Bahrain:ti,ab,kw OR Bangladesh:ti,ab,kw OR Barbados:ti,ab,kw OR Belarus:ti,ab,kw OR Belize:ti,ab,kw OR Benin:ti,ab,kw OR Bhutan:ti,ab,kw OR Bolivia:ti,ab,kw OR Bosnia:ti,ab,kw OR Herzegovina:ti,ab,kw OR Botswana:ti,ab,kw OR Brazil:ti,ab,kw OR Brunei:ti,ab,kw OR Bulgaria:ti,ab,kw OR 'Burkina Faso':ti,ab,kw OR Burundi:ti,ab,kw OR Cambodia:ti,ab,kw OR Cameroon:ti,ab,kw OR 'Cape Verde':ti,ab,kw OR 'Central African Republic':ti,ab,kw OR Chad:ti,ab,kw OR Chile:ti,ab,kw OR China:ti,ab,kw OR Colombia:ti,ab,kw OR Comoros:ti,ab,kw OR Democratic:ti,ab,kw OR Congo:ti,ab,kw OR 'Costa Rica':ti,ab,kw OR 'Cote d`Ivoire':ti,ab,kw OR Djibouti:ti,ab,kw OR Dominica:ti,ab,kw OR 'Dominican Republic':ti,ab,kw OR Ecuador:ti,ab,kw OR Egypt:ti,ab,kw OR 'El Salvador':ti,ab,kw OR 'Equatorial Guinea':ti,ab,kw OR Eritrea:ti,ab,kw OR Eswatini:ti,ab,kw OR Ethiopia:ti,ab,kw OR Fiji:ti,ab,kw OR Gabon:ti,ab,kw OR Gambia:ti,ab,kw OR Ghana:ti,ab,kw OR Grenada:ti,ab,kw OR Guatemala:ti,ab,kw OR Guinea:ti,ab,kw OR 'Guinea-Bissau':ti,ab,kw OR Guyana:ti,ab,kw OR Haiti:ti,ab,kw OR Honduras:ti,ab,kw OR Hungary:ti,ab,kw OR India:ti,ab,kw OR Indonesia:ti,ab,kw OR Iran:ti,ab,kw OR Iraq:ti,ab,kw OR Jamaica:ti,ab,kw OR Jordan:ti,ab,kw OR Kazakhstan:ti,ab,kw OR Kenya:ti,ab,kw OR Kiribati:ti,ab,kw OR Kosovo:ti,ab,kw OR Kuwait:ti,ab,kw OR Kyrgyzstan:ti,ab,kw OR Laos:ti,ab,kw OR Lebanon:ti,ab,kw OR Lesotho:ti,ab,kw OR Liberia:ti,ab,kw OR Libya:ti,ab,kw OR Macedonia:ti,ab,kw OR Madagascar:ti,ab,kw OR Malawi:ti,ab,kw OR Malaysia:ti,ab,kw OR Maldives:ti,ab,kw OR Mali:ti,ab,kw OR 'Marshall Islands':ti,ab,kw OR Mauritania:ti,ab,kw OR Mauritius:ti,ab,kw OR Mexico:ti,ab,kw OR Micronesia:ti,ab,kw OR Moldova:ti,ab,kw OR Mongolia:ti,ab,kw OR Montenegro:ti,ab,kw OR Morocco:ti,ab,kw OR Mozambique:ti,ab,kw OR Myanmar:ti,ab,kw OR Namibia:ti,ab,kw OR Nauru:ti,ab,kw OR Nepal:ti,ab,kw OR Nicaragua:ti,ab,kw OR Niger:ti,ab,kw OR Nigeria:ti,ab,kw OR Oman:ti,ab,kw OR Pakistan:ti,ab,kw OR Palau:ti,ab,kw OR Panama:ti,ab,kw OR Papua:ti,ab,kw OR 'New Guinea':ti,ab,kw OR Paraguay:ti,ab,kw OR Peru:ti,ab,kw OR Philippines:ti,ab,kw OR Poland:ti,ab,kw OR Qatar:ti,ab,kw OR Romania:ti,ab,kw OR Russia:ti,ab,kw OR Rwanda:ti,ab,kw OR 'Saint Kitts':ti,ab,kw OR Nevis:ti,ab,kw OR 'Saint Lucia':ti,ab,kw OR 'Saint Vincent':ti,ab,kw OR Grenadines:ti,ab,kw OR Samoa:ti,ab,kw OR 'Sao Tome':ti,ab,kw OR 'Saudi Arabia':ti,ab,kw OR Senegal:ti,ab,kw OR Serbia:ti,ab,kw OR Seychelles:ti,ab,kw OR Sierra:ti,ab,kw OR Leone:ti,ab,kw OR 'Solomon Islands':ti,ab,kw OR Somalia:ti,ab,kw OR 'South Africa':ti,ab,kw OR 'South Sudan':ti,ab,kw OR 'Sri Lanka':ti,ab,kw OR Sudan:ti,ab,kw OR Suriname:ti,ab,kw OR Swaziland:ti,ab,kw OR Syria:ti,ab,kw OR Tajikistan:ti,ab,kw OR Tanzania:ti,ab,kw OR Thailand:ti,ab,kw OR 'Timor-Leste':ti,ab,kw OR Togo:ti,ab,kw OR Tonga:ti,ab,kw OR Trinidad:ti,ab,kw OR Tobago:ti,ab,kw OR Tunisia:ti,ab,kw OR Turkey:ti,ab,kw OR Turkmenistan:ti,ab,kw OR Tuvalu:ti,ab,kw OR Uganda:ti,ab,kw OR Ukraine:ti,ab,kw OR 'United Arab Emirates':ti,ab,kw OR Uruguay:ti,ab,kw OR Uzbekistan:ti,ab,kw OR Vanuatu:ti,ab,kw OR Venezuela:ti,ab,kw OR Vietnam:ti,ab,kw OR Yemen:ti,ab,kw OR Zambia:ti,ab,kw OR Zimbabwe:ti,ab,kw |

Table 5.3 : Eric research strategy

| **Database** | **#** | **Concept** | **Search strategy** |
| --- | --- | --- | --- |
|
| ERIC via OVID  / 20210320 | #1 | Population= primary school age children | (Child* OR Preschooler*).mp. OR exp Preschool Children/ or exp Children/ |
| #2 | Exposition = stunting | (Growth Disorder* or Stunt* or nutrit* or 'Growth Failure*' or 'height for age' or 'height' or HAZ).mp. or Body Height/ |
| #3 | Outcome = schooling trajectory | (Enrollment* or 'age at school entry' or 'school start' or 'school admission' or 'academic performance*' or 'school dropout*' or ' school drop out*' or 'grade repetition' or 'repeat*' or 'school progression' or 'leave school').mp. or Enrollment/ or School Entrance Age/ or "Admission (School)"/ or "academic achievement"/ or Academic Failure/ or Dropouts/ or grade repetition/ |
| #4 | Geographic area = developing countries[1] | Developing Countries/ OR africa, northern/ or algeria/ or egypt/ or libya/ or morocco/ or tunisia/ or africa, central/ or cameroon/ or central african republic/ or chad/ or congo/ or "democratic republic of the congo"/ or equatorial guinea/ or gabon/ or "sao tome and principe"/ or burundi/ or djibouti/ or eritrea/ or ethiopia/ or kenya/ or rwanda/ or somalia/ or south sudan/ or sudan/ or tanzania/ or uganda/ or africa, southern/ or angola/ or botswana/ or lesotho/ or malawi/ or mozambique/ or namibia/ or south africa/ or swaziland/ or zambia/ or zimbabwe/ or africa, western/ or benin/ or burkina faso/ or cabo verde/ or cote d'ivoire/ or gambia/ or ghana/ or guinea/ or guinea-bissau/ or liberia/ or mali/ or mauritania/ or niger/ or nigeria/ or senegal/ or sierra leone/ or togo/ or caribbean region/ or aruba/ or caribbean netherlands/ or curacao/ or sint maarten/ or "antigua and barbuda"/ or bahamas/ or barbados/ or british virgin islands/ or cuba/ or dominica/ or dominican republic/ or grenada/ or guadeloupe/ or haiti/ or jamaica/ or martinique/ or puerto rico/ or "saint kitts and nevis"/ or saint lucia/ or "saint vincent and the grenadines"/ or "trinidad and tobago"/ or united states virgin islands/ or belize/ or costa rica/ or el salvador/ or guatemala/ or honduras/ or nicaragua/ or panama/ or mexico/ or argentina/ or bolivia/ or brazil/ or chile/ or colombia/ or ecuador/ or french guiana/ or guyana/ or paraguay/ or peru/ or suriname/ or uruguay/ or venezuela/ or asia/ or asia, central/ or kazakhstan/ or kyrgyzstan/ or tajikistan/ or turkmenistan/ or uzbekistan/ or asia, northern/ or russia/ or siberia/ or asia, southeastern/ or borneo/ or brunei/ or cambodia/ or indochina/ or timor-leste/ or indonesia/ or laos/ or malaysia/ or mekong valley/ or myanmar/ or philippines/ or singapore/ or thailand/ or vietnam/ or bangladesh/ or bhutan/ or india/ or sikkim/ or middle east/ or nepal/ or pakistan/ or sri lanka/ or far east/ or china/ or beijing/ or macau/ or tibet/ or korea/ or "democratic people's republic of korea"/ or "republic of korea"/ or mongolia/ or taiwan/ or (developing countr* or "developing nation " or "developing nations" or Afghanistan or Albania or Algeria or Angola or Antigua or Barbuda or Argentina or Armenia or Aruba or Azerbaijan or Bahamas or Bahrain or Bangladesh or Barbados or Belarus or Belize or Benin or Bhutan or Bolivia or Bosnia or Herzegovina or Botswana or Brazil or Brunei or Bulgaria or Burkina Faso or Burundi or Cambodia or Cameroon or Cape Verde).mp. or Central African Republic.mp. or Chad.mp. or Chile.mp. or China.mp. or Colombia.mp. or Comoros.mp. or Democratic.mp. or Congo.mp. or Costa Rica.mp. or Cote d'Ivoire.mp. or Djibouti.mp. or Dominica.mp. or Dominican Republic.mp. or Ecuador.mp. or Egypt.mp. or El Salvador.mp. or Equatorial Guinea.mp. or Eritrea.mp. or Eswatini.mp. or Ethiopia.mp. or Fiji.mp. or Gabon.mp. or Gambia.mp. or (Georgia not (USA or University)).mp. or Ghana.mp. or Grenada.mp. or Guatemala.mp. or Guinea.mp. or Guinea-Bissau.mp. or Guyana.mp. or Haiti.mp. or Honduras.mp. or Hungary.mp. or India.mp. or Indonesia.mp. or Iran.mp. or Iraq.mp. or Jamaica.mp. or Jordan.mp. or Kazakhstan.mp. or Kenya.mp. or Kiribati.mp. or Kosovo.mp. or Kuwait.mp. or Kyrgyzstan.mp. or Laos.mp. or Lebanon.mp. or Lesotho.mp. or Liberia.mp. or Libya.mp. or Macedonia.mp. or Madagascar.mp. or Malawi.mp. or Malaysia.mp. or Maldives.mp. or Mali.mp. or Marshall Islands.mp. or Mauritania.mp. or Mauritius.mp. or Mexico.mp. or Micronesia.mp. or Moldova.mp. or Mongolia.mp. or Montenegro.mp. or Morocco.mp. or Mozambique.mp. or Myanmar.mp. or Namibia.mp. or Nauru.mp. or Nepal.mp. or Nicaragua.mp. or Niger.mp. or Nigeria.mp. or Oman.mp. or Pakistan.mp. or Palau.mp. or Panama.mp. or Papua.mp. or New Guinea.mp. or Paraguay.mp. or Peru.mp. or Philippines.mp. or Poland.mp. or Qatar.mp. or Romania.mp. or Russia.mp. or Rwanda.mp. or Saint Kitts.mp. or Nevis.mp. or Saint Lucia.mp. or Saint Vincent.mp. or Grenadines.mp. or Samoa.mp. or "SaoTome".mp. or Saudi Arabia.mp. or Senegal.mp. or Serbia.mp. or Seychelles.mp. or Sierra.mp. or Leone.mp. or Solomon Islands.mp. or Somalia.mp. or South Africa.mp. or South Sudan.mp. or Sri Lanka.mp. or Sudan.mp. or Suriname.mp. or Swaziland.mp. or Syria.mp. or Tajikistan.mp. or Tanzania.mp. or Thailand.mp. or Timor-Leste.mp. or Togo.mp. or Tonga.mp. or Trinidad.mp. or Tobago.mp. or Tunisia.mp. or Turkey.mp. or Turkmenistan.mp. or Tuvalu.mp. or Uganda.mp. or Ukraine.mp. or United Arab Emirates.mp. or Uruguay.mp. or Uzbekistan.mp. or Vanuatu.mp. or Venezuela.mp. or Vietnam.mp. or Yemen.mp. or Zambia.mp. or Zimbabwe.mp. |

Table 5.4 : Embase research strategy

| **Database** | **#** | **Concept** | **Search strategy** |
| --- | --- | --- | --- |
|
| Web of Science  / 20200811 | #1 | Population= primary school age children | TS=(Child* OR Preschooler*) |
| #2 | Exposition = stunting | TS=(Growth Disorder* OR Stunt* OR nutrit* OR "Growth Failure*" OR "Height-for-age" OR height OR HAZ OR Anthropometry) |
| #3 | Outcome = schooling trajectory | TS=(Enrollment* OR "age at school entry" OR "school start" OR "school admission" OR "grade repetition" OR "school progression" OR repeat* OR "school dropout*" " school drop out*" "leave school" OR "academic Performance*" OR "School performance*" OR "Academic Failure*" OR "Educational Status" OR "academic achievement") |
| #4 | Geographic area = developing countries[1] | TS=("Developing Countries" OR "Northern Africa" or Algeria OR Egypt OR Libya OR morocco OR Tunisia OR " Central Africa" OR Cameroon OR "central african republic" OR chad OR congo OR "democratic republic of the congo" OR "Equatorial Guinea" OR gabon OR "Sao Tome and Principe" OR Burundi OR Djibouti OR Eritrea OR Ethiopia OR kenya OR Rwanda OR Somalia OR "south sudan" OR sudan OR Tanzania OR Uganda OR " Southern Africa" OR angola OR Botswana OR Lesotho OR malawi OR mozambique OR namibia OR "South Africa" OR swaziland OR zambia OR zimbabwe OR "Western Africa" OR benin OR "Burkina Faso" OR "Cabo Verde" OR "Cote d'Ivoire" OR gambia OR ghana OR guinea OR "Guinea-Bissau" OR liberia OR mali OR mauritania OR niger OR nigeria OR senegal OR sierra leone OR togo OR "Caribbean Region" OR aruba OR "Caribbean Netherlands" OR curacao OR "Sint Maarten" OR "antigua and barbuda" OR bahamas OR barbados OR "British Virgin Islands" OR cuba OR dominica OR "Dominican Republic" OR grenada OR guadeloupe OR haiti OR jamaica OR martinique OR "Puerto Rico" OR "saint kitts and nevis" OR "Saint Lucia" OR "Saint Vincent and the Grenadines" OR "Trinidad and Tobago" OR "United States Virgin Islands" OR belize OR "Costa Rica" OR "El SalvadOR" OR guatemala OR honduras OR nicaragua OR panama OR mexico OR argentina OR bolivia OR brazil OR chile OR colombia OR ecuador OR "French Guiana" OR Guyana OR paraguay OR peru OR suriname OR uruguay OR venezuela OR asia OR " Central Asia" OR kazakhstan OR kyrgyzstan OR tajikistan OR turkmenistan OR uzbekistan OR "northern asia" OR russia OR siberia OR " Southeastern Asia" OR borneo OR brunei OR cambodia OR indochina OR "timor-leste" OR indonesia OR laos OR malaysia OR "Mekong Valley" OR myanmar OR philippines OR singapore OR thailand OR vietnam OR bangladesh OR bhutan OR india OR sikkim OR "Middle East" OR nepal OR pakistan OR "Sri Lanka" OR "Far East" OR china OR beijing OR macau OR tibet OR korea OR "Democratic People's Republic of Korea" OR "Republic of Korea" OR mongolia OR taiwan OR "United Arab Emirates" OR "Republic of Georgia" OR "developing countr*" OR "developing nation*" OR Afghanistan OR Albania OR Armenia OR Azerbaijan OR Bahrain OR Belarus OR Bosnia OR Herzegovina OR Bulgaria OR "Cape Verde" OR Comoros OR Eswatini OR Fiji OR Hungary OR Iran OR Iraq OR Jordan OR Kiribati OR Kosovo OR Kuwait OR Lebanon OR Macedonia OR Madagascar OR Maldives OR "Marshall Islands" OR Mauritius OR Micronesia OR Moldova OR Montenegro OR Nauru OR Palau OR Papua OR "New Guinea" OR Poland OR Qatar OR Romania OR Samoa OR "Saudi Arabia" OR Serbia OR Seychelles OR "Solomon Islands" OR Syria OR Tonga OR Turkey OR Tuvalu OR Ukraine OR Vanuatu OR Yemen) |

Table 5.5 : PsyInfo research strategy

| **Database** | **#** | **Concept** | **Search strategy** |
| --- | --- | --- | --- |
|
| PsycInfo via OVID  / 20210320 | #1 | Population= primary school age children | (Child* OR 'Preschooler*').mp. OR (preschool age 2 5 yrs or school age 6 12 yrs).ag. OR child.mh. OR exp preschool students/ OR exp primary school students/ |
| #2 | Exposition = stunting | ("Growth Disorder*" or Stunt* or "Growth Failure*" or height-for-age or height or HAZ or nutrit*).mp. OR exp Body Height/ OR "Body Height".mh. OR growth disorders.mh. OR anthropometry.mh. OR exp anthropometry/ |
| #3 | Outcome = schooling trajectory | (Enrollment* OR "age at school entry" OR "school start" OR "school admission" OR "academic performance*" OR "school dropout*" OR "school drop out*" OR "grade repetition" OR repeat* OR "school progression" OR "leave school").mp. or exp School Enrollment/ or "academic failure".mh. or exp "academic failure"/ or "academic performance".mh. or exp Academic Achievement/ or exp dropouts/ |
| #4 | Geographic area = developing countries[1] | Developing Countries/ OR africa, northern/ or algeria/ or egypt/ or libya/ or morocco/ or tunisia/ or africa, central/ or cameroon/ or central african republic/ or chad/ or congo/ or "democratic republic of the congo"/ or equatorial guinea/ or gabon/ or "sao tome and principe"/ or burundi/ or djibouti/ or eritrea/ or ethiopia/ or kenya/ or rwanda/ or somalia/ or south sudan/ or sudan/ or tanzania/ or uganda/ or africa, southern/ or angola/ or botswana/ or lesotho/ or malawi/ or mozambique/ or namibia/ or south africa/ or swaziland/ or zambia/ or zimbabwe/ or africa, western/ or benin/ or burkina faso/ or cabo verde/ or cote d'ivoire/ or gambia/ or ghana/ or guinea/ or guinea-bissau/ or liberia/ or mali/ or mauritania/ or niger/ or nigeria/ or senegal/ or sierra leone/ or togo/ or caribbean region/ or aruba/ or caribbean netherlands/ or curacao/ or sint maarten/ or "antigua and barbuda"/ or bahamas/ or barbados/ or british virgin islands/ or cuba/ or dominica/ or dominican republic/ or grenada/ or guadeloupe/ or haiti/ or jamaica/ or martinique/ or puerto rico/ or "saint kitts and nevis"/ or saint lucia/ or "saint vincent and the grenadines"/ or "trinidad and tobago"/ or united states virgin islands/ or belize/ or costa rica/ or el salvador/ or guatemala/ or honduras/ or nicaragua/ or panama/ or mexico/ or argentina/ or bolivia/ or brazil/ or chile/ or colombia/ or ecuador/ or french guiana/ or guyana/ or paraguay/ or peru/ or suriname/ or uruguay/ or venezuela/ or asia/ or asia, central/ or kazakhstan/ or kyrgyzstan/ or tajikistan/ or turkmenistan/ or uzbekistan/ or asia, northern/ or russia/ or siberia/ or asia, southeastern/ or borneo/ or brunei/ or cambodia/ or indochina/ or timor-leste/ or indonesia/ or laos/ or malaysia/ or mekong valley/ or myanmar/ or philippines/ or singapore/ or thailand/ or vietnam/ or bangladesh/ or bhutan/ or india/ or sikkim/ or middle east/ or nepal/ or pakistan/ or sri lanka/ or far east/ or china/ or beijing/ or macau/ or tibet/ or korea/ or "democratic people's republic of korea"/ or "republic of korea"/ or mongolia/ or taiwan/ or (developing countr* or "developing nation" or "developing nations" or Afghanistan or Albania or Algeria or Angola or Antigua or Barbuda or Argentina or Armenia or Aruba or Azerbaijan or Bahamas or Bahrain or Bangladesh or Barbados or Belarus or Belize or Benin or Bhutan or Bolivia or Bosnia or Herzegovina or Botswana or Brazil or Brunei or Bulgaria or Burkina Faso or Burundi or Cambodia or Cameroon or Cape Verde).mp. or Central African Republic.mp. or Chad.mp. or Chile.mp. or China.mp. or Colombia.mp. or Comoros.mp. or Democratic.mp. or Congo.mp. or Costa Rica.mp. or Cote d'Ivoire.mp. or Djibouti.mp. or Dominica.mp. or Dominican Republic.mp. or Ecuador.mp. or Egypt.mp. or El Salvador.mp. or Equatorial Guinea.mp. or Eritrea.mp. or Eswatini.mp. or Ethiopia.mp. or Fiji.mp. or Gabon.mp. or Gambia.mp. or (Georgia not (USA or University)).mp. or Ghana.mp. or Grenada.mp. or Guatemala.mp. or Guinea.mp. or Guinea-Bissau.mp. or Guyana.mp. or Haiti.mp. or Honduras.mp. or Hungary.mp. or India.mp. or Indonesia.mp. or Iran.mp. or Iraq.mp. or Jamaica.mp. or Jordan.mp. or Kazakhstan.mp. or Kenya.mp. or Kiribati.mp. or Kosovo.mp. or Kuwait.mp. or Kyrgyzstan.mp. or Laos.mp. or Lebanon.mp. or Lesotho.mp. or Liberia.mp. or Libya.mp. or Macedonia.mp. or Madagascar.mp. or Malawi.mp. or Malaysia.mp. or Maldives.mp. or Mali.mp. or Marshall Islands.mp. or Mauritania.mp. or Mauritius.mp. or Mexico.mp. or Micronesia.mp. or Moldova.mp. or Mongolia.mp. or Montenegro.mp. or Morocco.mp. or Mozambique.mp. or Myanmar.mp. or Namibia.mp. or Nauru.mp. or Nepal.mp. or Nicaragua.mp. or Niger.mp. or Nigeria.mp. or Oman.mp. or Pakistan.mp. or Palau.mp. or Panama.mp. or Papua.mp. or New Guinea.mp. or Paraguay.mp. or Peru.mp. or Philippines.mp. or Poland.mp. or Qatar.mp. or Romania.mp. or Russia.mp. or Rwanda.mp. or Saint Kitts.mp. or Nevis.mp. or Saint Lucia.mp. or Saint Vincent.mp. or Grenadines.mp. or Samoa.mp. or "SaoTome".mp. or Saudi Arabia.mp. or Senegal.mp. or Serbia.mp. or Seychelles.mp. or Sierra.mp. or Leone.mp. or Solomon Islands.mp. or Somalia.mp. or South Africa.mp. or South Sudan.mp. or Sri Lanka.mp. or Sudan.mp. or Suriname.mp. or Swaziland.mp. or Syria.mp. or Tajikistan.mp. or Tanzania.mp. or Thailand.mp. or Timor-Leste.mp. or Togo.mp. or Tonga.mp. or Trinidad.mp. or Tobago.mp. or Tunisia.mp. or Turkey.mp. or Turkmenistan.mp. or Tuvalu.mp. or Uganda.mp. or Ukraine.mp. or United Arab Emirates.mp. or Uruguay.mp. or Uzbekistan.mp. or Vanuatu.mp. or Venezuela.mp. or Vietnam.mp. or Yemen.mp. or Zambia.mp. or Zimbabwe.mp. |

Table 6: Data extraction form

| **Label** | **Name** | **Type** | **Description** | **Modalities** | **Comments** |
| --- | --- | --- | --- | --- | --- |
| **Study Characteristics** | | | | | |
| author | First author | ALPNUM | This is the family name of the first author | Text | Report only the family name of the first author |
| ypub | Year of publication | NUM | Year of publication | Number | Report the year of publication |
| jpub | Journal of publication | ALPNUM | Journal of publication | Text | Indicate here the journal in which the study was published |
| **Population Characteristics** | | | | | |
| Ssize | Sample size | NUM | This is the total number of children included in the study | Number | The sample size corresponds to the number of individuals included in the study. |
| Pgirl | Percentage of girl | NUM | This the percentage of girls | Number | Report the percentage of girls that is the ratio between the number of girls and the total sample size. |
| Pboy | Percentage of boy | NUM | This the percentage of boys | Number | Report the percentage of boys that is the ratio between the number of boys and the sample size. |
| MAge | Mean of age in years | NUM | This is the average age of population study | Number | Report the mean age of the sample size. |
| scountry | Country of study | ALPNUM | This is the country of the study | Text | Report the name of the country where the study held. |
| **Exposure characteristics** | | | | | |
| Mexposure | Measure of exposure | NUM | This is the format in which the exposure is measured in the study | 1- Height 2- Height-for-age 3- Stunting | Report here how the exposure is measured. In general, exposure is measured by HAZ, stunting or height of the children in the studies. |
| Aexposure | Age to the measure of the exposure | NUM | Age at which the exposure was measured | Number | Indicate the age at which the child exposure was measured. |
| Meanexpo | Mean of quantitative exposure | NUM | Average exposure value measured quantitatively (height or height-for-age). | Number | Provide here the means of heights or the means of the height-for-age. If the information is not available, type "NA" |
| pstunting | Proportion of children who are stunted | NUM | Proportion of children with severe stunting | Number | If the exposure variable is qualitative, report the proportion of children with stunting. If the variable has three categories, then the proportion of stunted will be the sum of moderate and severe stunting. |
| **Study design** | | | | | |
| Sdesign | Study design | NUM | This is the type of study design. | 1 - Cross-sectional 2 - prospective cohort 3 - Retrospective cohort 4 - Case control 5 - Case series | Report the study design. It is related to how the data was collected. The information is generally indicated in the methodology section. |
| Dfollow | Duration of follow-up | NUM | This is the time between the observation of the exposure and the outcome. | Number | Report here the number of years of follow-up. For example, in the case of a cross-sectional study, the duration of follow-up will be zero. If it is a prospective study, the duration will be the time between the observation of the exposure and the outcome. |
| Magebf | Mean age at the beginning of the follow-up | NUM | Mean age when the exposure is measured | Number | Report the mean age of the study population when the exposure is measured |
| Minagebf | Minimum age at the beginning of the follow-up | NUM | Minimum age when the exposure is measured | Number | Report the minimum age of the study population when the exposure is measured |
| Mageef | Mean age at the end of the follow-up | NUM | Mean age when the outcome is measured | Number | Report the mean age of the study population when the outcome is measured |
| Minageef | Minimum age at the end of the follow-up | NUM | Minimum age when the outcome is measured | Number | Report the minimum age of the study population when the outcome is measured |
| **Outcome and effect measure** | | | | | |
| **Age at school entry** | | | | | |
| Aschent | Age at school entry | NUM | Indicate if the age at school entry is analyzed in the study | 1-Yes 2-No | Report if the age at school entry is analyzed in the article. If it is not then the next, other information about the age at school entry will stay blank. |
| Avartyp | Type of variable | NUM | Indicate what type of variable is used to measure the age at school entry | 1 – Continuous 2 – Categorical | Select the type of variable used to measure the age at school entry. The variable is categorical if it is grouped in two or more group age. The type of variable is continuous if it is the exact or past age that is considered in the analyses. |
| Anagesch | Analysis method | ALPNUM | Analysis method of age at school entry | Text | Report the multivariate method used to estimate the effect of the stunting (height for age or height) to analyze the outcome age at school entry. |
| Effetagesch | Effect measure | NUM | This is the type measure of effect | 1 - Odd ratio 2 - Relative risk 3- Hazard ratio 4- Mean difference | Indicate the type of measure of the effect that is used to estimate the effect of stunting, height-for-age or height on the age at school entry. |
| Covagesch | List of covariates | ALPNUM | List of all the adjustment variables | Text | Report here the list of all the covariates used in the article as confounding factor to estimate the adjusted effect |
| Estagesch | Estimated measure of effect | NUM | The adjusted risk difference estimated | Number | Report the estimated adjusted risk difference of the stunting of the number of completed grades. |
| Seagesch | Standard error of the estimated effect | NUM | Standard error of the measure of effect | Number | Report the standard error of the estimated effect |
| LICagesch | Lower bound of the confidence interval | NUM | Lower bound of the confidence interval of the measure of effect | Number | Report the lower limit of the confidence interval of the estimated effect |
| UICagesch | Upper bound of the confidence interval | NUM | Upper bound of the confidence interval of the measure of effect | Number | Report the upper limit of the confidence interval of the estimated effect |
| Pvagesch | P-value of estimated effect | NUM | P-value of the measure of effect | Number | Report the p-value of the estimated effect |
| **Schooling level** | | | | | |
| Schlevel | Schooling level or level of education | NUM | Indicate if the schooling level or the level of education is analyzed in the study | 1-Yes 2-No | Report if the age at schooling level or education level is analyzed in the article. If it is not then the next, other information about the schooling level will stay blank. |
| schlvartyp | Type of variable | NUM | Indicate what type of variable is used to measure the age at school entry. | 1 - Continuous 2 - Categorical 3- Both | Select the type of variable used to measure the schooling level. The variable is categorical if it is grouped in two or more groups. The variable is continuous if schooling is measured for example by the number of grades achieved or level of education. |
| Anaschlevel | Analysis method | ALPNUM | Analysis method of schooling level or level of education. | Text | Report the multivariate method used to estimate the effect of the stunting (height for age or height) to analyze the outcome schooling level. |
| Effchllevel | Effect measure | NUM | This is the type measure of effect | 1 - Odd ratio 2 - Relative risk 3- Hazard ratio 4- Mean difference | Indicate the type of measure of the effect that is used to estimate the effect of stunting, height-for-age or height on the schooling level. |
| Covschlevel | List of covariates | ALPNUM | List of all the adjustment variables | Text | Report here the list of all the covariates used in the article as confounding factor to estimate the adjusted effect of stunting (height-for-age or height) on schooling level or education level. |
| Estschlevel | Estimated measure of effect | NUM | The adjusted effect of stunting on schooling level. | Number | Report the estimated adjusted effect of stunting on the number of completed grades or schooling level. |
| Seschlevel | Standard error of the estimated effect | NUM | Standard error of the measure of effect | Number | Report the standard error of the estimated effect of stunting (height-for-age or height) on schooling level or education level. |
| LICschlevel | Lower bound of the confidence interval | NUM | Lower bound of the confidence interval of the measure of effect | Number | Report the lower limit of the confidence interval of the estimated effect of stunting (height-for-age or height) on schooling level or education level. |
| UICschlevel | Upper bound of the confidence interval | NUM | Upper bound of the confidence interval of the measure of effect | Number | Report the upper limit of the confidence interval of the estimated effect of stunting (height-for-age or height) on schooling level or education level. |
| Pvschlevel | P-value of estimated effect | NUM | P-value of the measure of effect | Number | Report the p-value of the estimated effect of stunting (height-for-age or height) on schooling level or education level. |
| **Grade repetition** | | | | | |
| grep | Grade repetition | NUM | Indicate if the grade repetition is analyzed in the study | 1-Yes 2-No | Report if the grade repetition is analyzed in the article. If it is not then the next, other information about grade repetition will stay blank. |
| grepvartyp | Type of variable | NUM | Indicate what type of variable is used to measure the grade repetition | 1 - Continuous 2 - Categorical 3- Both | Select the type of variable used to measure the grade repetition. The variable is categorical if it is grouped in two or more groups. The variable is continuous if the grade repetition is measured by the number of grade repetition. |
| Anagrep | Analysis method | ALPNUM | Analysis method of grade repetition | Text | Report the multivariate method used to estimate the effect of the stunting (height for age or height) to analyze the outcome grade repetition. |
| Effectgrep | Effect measure | NUM | This is the type of measure of effect | 1 - Odd ratio 2 - Relative risk 3- Hazard ratio 4- Mean difference | Indicate the type of measure of the effect that is used to estimate the effect of stunting, height-for-age or height on grade repetition. |
| Covgrep | List of covariates | ALPNUM | List of all the adjustment variables | Text | Report here the list of all the covariates used in the article as confounding factor to estimate the adjusted effect of stunting (height-for-age or height) on grade repetition. |
| Estgrep | Estimated measure of effect | NUM | The adjusted effect of stunting on grade repetition. | Number | Report the estimated adjusted effect of stunting on grade repetition. |
| Segrep | Standard error of the estimated effect | NUM | Standard error of the measure of effect | Number | Report the standard error of the estimated effect of stunting (height-for-age or height) on grade repetition. |
| LICgrep | Lower bound of the confidence interval | NUM | Lower bound of the confidence interval of the measure of effect | Number | Report the lower limit of the confidence interval of the estimated effect of stunting (height-for-age or height) on grade repetition. |
| UICgrep | Upper bound of the confidence interval | NUM | Upper bound of the confidence interval of the measure of effect | Number | Report the upper limit of the confidence interval of the estimated effect of stunting (height-for-age or height) on grade repetition. |
| Pgrep | P-value of estimated effect | NUM | P-value of the measure of effect | Number | Report the p-value of the estimated effect of stunting (height-for-age or height) on grade repetition. |
| **School dropout** | | | | | |
| dropo | School dropout | NUM | Indicate if the school dropout is analyzed in the study | 1-Yes 2-No | Report if the school dropout is analyzed in the article. If it is not, the next other information about dropouts will stay blank. |
| dropovartyp | Type of variable | NUM | Indicate what type of variable is used to measure the drop out | 1 - Continuous 2 - Categorical 3- Both | Select the type of variable used to measure the school dropout. The variable is categorical if it is grouped in two or more groups. The variable is continuous if the drop out is measured by the number of grade repetition. Note that for this outcome, the variable type will generally be categorical. |
| Anadropo | Analysis method | ALPNUM | Method used to analyze the school dropout | Text | Report the multivariate method used to estimate the effect of the stunting (height for age or height) to analyze the outcome school dropout. |
| Effectdropo | Effect measure | NUM | This is the type of measure of effect | 1- Odd ratio 2- Relative risk 3- Hazard ratio 4- Mean difference | Indicate the type of measure of the effect that is used to estimate the effect of stunting, height-for-age or height on school dropouts. |
| Covdropo | List of covariates | ALPNUM | List of all the adjustment variables | Text | Report here the list of all the covariates used in the article as confounding factor to estimate the adjusted effect of stunting (height-for-age or height) on school dropouts. |
| Estdropo | Estimated measure of effect | NUM | The adjusted effect of stunting on school dropouts. | Number | Report the estimated adjusted effect of stunting on school dropouts. |
| Sedropout | Standard error of the estimated effect | NUM | Standard error of the measure of effect | Number | Report the standard error of the estimated effect of stunting (height-for-age or height) on school dropouts. |
| LICdropo | Lower bound of the confidence interval | NUM | Lower bound of the confidence interval of the measure of effect | Number | Report the lower limit of the confidence interval of the estimated effect of stunting (height-for-age or height) on school dropouts. |
| UICdropo | Upper bound of the confidence interval | NUM | Upper bound of the confidence interval of the measure of effect | Number | Report the upper limit of the confidence interval of the estimated effect of stunting (height-for-age or height) on school dropouts. |
| Pdropo | P-value of estimated effect | NUM | P-value of the measure of effect | Number | Report the p-value of the estimated effect of stunting (height-for-age or height) on school dropouts. |

Geographic area was adapted from the filter proposed by:

1. Campbell, S., *Filter to Retrieve Studies Related to Developing Countries in the OVID Medline Database*. John W. Scott Health Sciences Library University of Alberta. Rev. January 5, 2019.
